1 **Survival trends among people living with human immunodeficiency virus on antiretroviral**  
2 **treatment in two rural districts in Ghana**

3  
4 **Authors**

5 Eugene Sackeya<sup>1,2</sup>, Martin Muonibe Beru<sup>1,3</sup>, Richard Nomo Angmortey<sup>1,3</sup>, Kingsley Boakye<sup>1</sup>,  
6 Musah Baatira<sup>1,8</sup>, Mohammed Sheriff Yakubu<sup>1,6</sup>, Douglas Aninng Opoku<sup>5,7</sup>, Aliyu Mohammed<sup>1</sup>,  
7 Nana Kwame Ayisi-Boateng<sup>9</sup>, Daniel Boateng<sup>1,4</sup>, Emmanuel Kweku Nakua<sup>1</sup>, and Anthony  
8 Kweku Edusei<sup>10</sup>

9  
10 **Affiliations**

11 <sup>1</sup>Department of Epidemiology and Biostatistics, School of Public Health, Kwame Nkrumah  
12 University of Science and Technology, Kumasi, Ghana.

13 <sup>2</sup>Tatale District Hospital, Tatale, Northern Region, Ghana.

14 <sup>3</sup>Tamale Teaching Hospital, Tamale Metropolitan, Tamale - Ghana.

15 <sup>4</sup>Julius Global Health, Julius Centre for Health Sciences and Primary Care, University Medical  
16 Centre, Utrecht, The Netherlands.

17 <sup>5</sup>Allen Clinic, Family Health Services, Kumasi, Ghana.

18 <sup>6</sup>Nursing and Midwifery Training College, Nalerigu-Ghana.

19 <sup>7</sup>Department Of Global Health and Internal Health, School of Public Health, Kwame Nkrumah  
20 University of Science and Technology, Kumasi, Ghana.

21 <sup>8</sup>St. Joseph's Midwifery Training College, Jirapa, Ghana.

22 <sup>9</sup>Department Of Medicine, School of Medicine and Dentistry, Kwame Nkrumah University of  
23 Science and Technology, Kumasi, Ghana

24 <sup>10</sup>Department of Health Promotion, School of Public Health, Kwame Nkrumah University of  
25 Science and Technology, Kumasi, Ghana.

26  
27 **Corresponding Author**

28 Eugene Sackeya: [mcsackeya@gmail.com](mailto:mcsackeya@gmail.com)

29

30

31 **Abstract**

32 **Background:** The human immunodeficiency virus (HIV) has caused a lot of havoc since the early  
33 1970s, affecting 37.6 million people worldwide. The 90-90-90 treatment policy was adopted in  
34 Ghana in 2015 with the overall aim to end new infections by 2030, and to improve the life  
35 expectancy of HIV seropositive individuals. With the scale-up of Highly Active Antiretroviral  
36 Therapy (HAART), the lifespan of People Living with HIV (PLWH) on antiretrovirals (ARVs) is  
37 expected to improve. In rural districts in Ghana, little is known about the survival probabilities of  
38 PLWH on ARVs hence, this study was conducted to estimate the survival trends of PLWH on  
39 ARVs for the periods between 2016 to 2020.

40 **Methods:** A retrospective evaluation of data gathered across ARV centers within Tatale and  
41 Zabzugu districts in Ghana from 2016 to 2020 among PLWH on ARVs. The census technique was  
42 employed and a total of 261 participants were recruited for the study. The data was analyzed using  
43 STATA software version 16.0. Lifetable analysis and Kaplan-Meier graph were used to assess the  
44 survival probabilities. “Stptime” per 1000 person-years and the competing risk regression was  
45 used to evaluate mortality rates and risk of mortality.

46 **Results:** The cumulative survival probability was 0.8847 (95% CI: 0.8334-0.9209). The overall  
47 mortality rate was 51.89 (95% CI: 36.89-72.97) per 1000 person-years. WHO stage III and IV  
48 [AHR: 4.25 (95%CI: 1.6-9.71) p = 0.001] as well as age group (50+ years) [AHR: 5.02 (95% CI:  
49 1.78-14.13) p=0.002] were associated with mortality.

50 **Conclusion:** Survival probabilities is high among the population of PLWH in Ghana with  
51 declining mortality rates. Clinicians should provide critical attention and care to patients at HIV  
52 WHO stages III and IV and intensify HIV screening at all entry points since early diagnosis is  
53 associated with high survival probabilities.

54

55 **Keywords:** Antiretroviral; Competing risk; Ghana; HIV; PLHIV; Survival trends

56

57

58

59

## 60 **Background**

61 The human immunodeficiency virus (HIV), the organism responsible for acquired immune  
62 deficiency syndrome (AIDS) has caused a lot of havoc to individuals and families since its  
63 outbreak in the early 1970s [1,2]. HIV has affected 37.6 million people worldwide as of 2020, with  
64 an estimated 27.4 million people accessing antiretroviral (ARVs) therapy globally [3].

65 The majority affected by this HIV pandemic live in low and middle-income countries (LMICs)  
66 with 20.6 million (55%) of all cases from eastern and southern Africa, while 4.7 million (13%) are  
67 in western and central Africa [3,4]. In Ghana, about 342,307 people are living with HIV (PLWH)  
68 and of these, 77% of them are receiving lifesaving highly active antiretroviral therapy (HAART)  
69 [5]. The therapeutic value of antiretroviral therapy (ART) for PLWH is undeniable and early  
70 initiation of ART reduces morbidity and mortality. It is evident that when HIV replication is  
71 suppressed, patients have significant improvement in immunologic status, as seen by higher  
72 clusters of differentiation 4 (CD4) counts, lower AIDS-related morbidity and death, and, in many  
73 cases, a return to a normal or near-normal quality of life [6]. The advantages of early ART include  
74 a reduction in not just classic AIDS-related problems, but also end-stage organ damage as well as  
75 non-AIDS-defining malignancies [6].

76 ART administration was introduced in Ghana in June 2003 as part of a comprehensive care  
77 package including voluntary counseling and testing (VCT), prevention of mother-to-child  
78 transmission (PMTCT) of HIV, and the treatment and management of sexually transmitted  
79 infections (STIs) [7]. However, only PLWH whose CD4 count was  $\leq 350$  or classified as being in  
80 WHO stages III and IV were initiated on ARVs [7,8]. Owing to the global impact of the HIV  
81 pandemic exceeding all expectations, with a mortality peak of 1.9 million deaths in 2006 to 0.95  
82 million in 2017 [9], the World Health Organization (WHO) and its partners adopted an ambitious  
83 treatment target, dubbed the 90-90-90 agenda which was reviewed in 2020 to 95-95-95. In this  
84 policy, 95% of PLWH should know their status, 95% of those who know their status should be on  
85 ARVs and 95% of those on ARVs should achieve viral suppression [4]. This treatment policy is  
86 in line with sustainable development goal three which emphasizes the need for good health and  
87 well-being of all people by 2030 with HIV being one of the significant indicators [11].

88 Ghana, a WHO member state adopted this policy in 2015 with efforts made to increase  
89 accessibility to HIV counseling and testing services, provision of ARVs for all those living with

90 HIV and enhanced evaluation of effectiveness of ARVs through regular viral load assessment at  
91 regular intervals at no cost to the clients [5]. As of 2019 in Ghana, 58% of PLWH know their HIV  
92 status, of this number, 77% of them are receiving ARVs and 68% of those receiving ARVs have  
93 their viral load suppressed [5,12].

94 During the early 1980s, to be diagnosed with HIV in Ghana was synonymous with a death  
95 sentence, however, with the scale-up of HAART, more PLWH are now receiving the lifesaving  
96 ARVs with the aim of improving their life expectancy [13]. In Ghana there is limited data on  
97 survival trends of PLWH. This study therefore sought to estimate the survival trends of PLWH  
98 on ARVs for the periods between 2016 to 2020, the mortality rate and the associated risk factors.

99

## 100 **Methods**

### 101 **Study Design**

102 The study was a retrospective evaluation of data from antiretroviral therapy (ART) sites in two  
103 rural districts in Ghana (Zabzugu and Tatale Districts).

104

### 105 **Study Setting**

106 The study was conducted in the Zabzugu and Tatale districts of the northern region of the Republic  
107 of Ghana. These two districts were purposively selected based on their active involvement in ART  
108 in the region. Participants were drawn from four ART centers at the Zabzugu district hospital  
109 (ZDH), Tatale district hospital (TDH), Kpalbutabu Health Center -Tatale and Nakpali Health  
110 Center -Zabzugu. With the capitals of the two districts being Zabzugu and Tatale respectively,  
111 they share a border with Togo in the east, to the north with Saboba, to the west Yendi, and to the  
112 south, Wulensi. Zabzugu District covers an area of 1,100.1 square kilometer and Tatale Sangule  
113 district covers an area of about 1,130 square kilometers [14,15].

114

### 115 **Study Population**

116 The study population included PLWH, 13 years old and above, in the Tatale and Zabzugu districts  
117 who were diagnosed and enrolled on ARVs. The study participants were PLWH who were  
118 diagnosed not earlier than 2016 or were diagnosed earlier but started ARVs in 2016 through to  
119 2020. PLWH less than 13years at the time of registration due to their dependency on parents and

120 care givers likely to influence adherence and those who were transferred from districts outside the  
121 two districts for lack of adequate information were excluded.

122

### 123 **Sampling Technique**

124 The census sampling technique was used for the selection of the research participants. The study  
125 participants included all PLWH who were diagnosed with HIV from 2016 to 2020 and followed  
126 for varying number of years, but not exceeding five years. A sample size of 261 participants were  
127 considered for this study. The sample size constituted the entire number of PLWH who started  
128 their treatment from 2016 to 2020. A total of 275 PLHIV were registered within the period, while  
129 14 participants were excluded from the study as a result of transfers, under age (< 13years) and  
130 incomplete information. Most of the participants entered the study at different entry points but 31st  
131 December 2021 was the administrative censoring date for all participants.

132

### 133 **Variables description**

#### 134 **Dependent variable:**

135 The main outcome variable was the survival probabilities of PLWH on ARVs. This predicted the  
136 chance of a participant being alive following the initiation to ARVs during the study period. The  
137 secondary outcomes included the mortality rate and the risk factors for mortality.

138

#### 139 **Independent variables:**

140 The study used eleven (11) independent variables. These included the type of regimen the person  
141 was on, which is either a efavirenz-based combination or a dolutegravir-based combination,  
142 comorbidity/coinfection defined as any other medical condition that co-existed with HIV or AIDS  
143 during diagnosis, HIV status disclosure refers to disclosing one's HIV status to anyone other than  
144 a healthcare provider, and enrolment on the National Health Insurance Scheme (NHIS). The  
145 remaining variables included the participant's marital status, WHO HIV stages (I, II, III, and IV),  
146 client's locality or area of residence, client's health facility where ARVs is received, gender and  
147 religion.

148

149

150

151 **Data Collection and Management**

152 Data collection was conducted from 1<sup>st</sup> July 2022 to 31<sup>st</sup> August 2022 using a standard checklist  
153 by two public health nurses and a postgraduate student of Epidemiology and Biostatistics. This  
154 was done by reviewing existing medical records including the patient's ARVs folder, the pharmacy  
155 logbook, the ARVs logbook, and the viral load register. Two different data collection officers  
156 collected the same data set and incomplete forms were returned to be completed and those that  
157 were not completed for lack of adequate information were dropped. The data was validated by  
158 comparing the data from the two research assistants to ensure accuracy and consistency. After  
159 cleaning, the data was stored in a hard drive and also in Google drive for future use and protection.

160

161 **Data Analysis**

162 Data was analyzed using the STATA statistical software version 16.0. Descriptive statistics were  
163 used to describe the baseline characteristics of participants including the socio-demographic and  
164 the clinical characteristics. For the person-time computation, the date of administrative censorship  
165 (December 31, 2021) was considered as the last date for all persons who were still alive and  
166 receiving treatment. For the assessment of the survival probabilities, lifetable analysis was done  
167 alongside the display of a survival function using a Kaplan-Meier graph to assess variations in  
168 survival among subgroups. The overall mortality rate was calculated using stptime per 1000 person  
169 years. The stptime command computed and tabulated the person-time and the incidence rate. The  
170 subgroup mortality rates were calculated using stptime adjusting for the subgroup per 1000 person  
171 years. To examine the association between baseline factors and mortality, the Competing risk  
172 regression model was used. Statistical significance was set at p-value <0.05 at a confidence  
173 interval of 95%. Variables (both significant and insignificant at the Univariate level) that were  
174 deemed to be important based on previous studies [15,16] were included in the multivariable  
175 analysis.

176

177 **Ethical consideration**

178 Ethical clearance was granted by the Committee for Human Research, Publication and Ethics of  
179 the Kwame Nkrumah University of Science and Technology with reference number  
180 CHRPE/AP/287/22. Participants informed consent was not taken since this study involved a  
181 review of secondary data from hospital medical records and the patients were not available at the

182 time of the data collection. This was explained in the application for the ethical clearance and  
 183 participants' consent was waived by the ethics committee. All the study data that were collected  
 184 were completely anonymized.

185

## 186 **Results**

### 187 **Socio-Demographic Characteristics of Participants**

188 The study participants who were in the age category of 30 to 39 years were 41.0% with the median  
 189 age (interquartile range) of 35 (14) years. More than half (66.28%) of study participants were  
 190 females while a little over one third (42.53%) were Christians. Approximately 51.34% resided in  
 191 the Tatale Sanguli district even though 58.62% received their medications from the Zabzugu  
 192 district. Those who had no formal education constituted 72.03% of the participants while 61.30%  
 193 were non-skilled workers. Approximately 89.7% were married and 90.42% of them were  
 194 registered with the National Health Insurance Scheme (NHIS) (Table 1).

195

196 **Table 1: Socio-demographic characteristics of participants**

| <b>Variable</b>         | <b>Zabzugu District<br/>Frequency (%)</b> | <b>Tatale District<br/>Frequency (%)</b> | <b>Total (%)</b> |
|-------------------------|-------------------------------------------|------------------------------------------|------------------|
| Age (years)             |                                           |                                          |                  |
| <b>13-19</b>            | 2 (0.8)                                   | 10 (3.8)                                 | 12 (4.6)         |
| <b>20-29</b>            | 32 (12.3)                                 | 31 (11.9)                                | 63 (24.2)        |
| <b>30-39</b>            | 74 (28.4)                                 | 33 (12.6)                                | 107 (41.0)       |
| <b>40-49</b>            | 28 (10.7)                                 | 14 (5.4)                                 | 42 (16.1)        |
| <b>50+</b>              | 17 (6.5)                                  | 20 (7.6)                                 | 37 (14.1)        |
| Median age (IQR)        | <b>35 (14)</b>                            |                                          |                  |
| Gender                  |                                           |                                          |                  |
| <b>Male</b>             | 59 (22.6)                                 | 29 (11.1)                                | 88 (33.7)        |
| <b>Female</b>           | 94 (36.0)                                 | 79 (30.3)                                | 173 (66.3)       |
| Religion                |                                           |                                          |                  |
| <b>Christain</b>        | 50 (19.2)                                 | 61 (23.1)                                | 111 (42.5)       |
| <b>Muslim</b>           | 64 (24.5)                                 | 17 (6.5)                                 | 81 (31.1)        |
| <b>Traditional</b>      | 39 (14.9)                                 | 30 (11.5)                                | 69 (26.4)        |
| District-of-Residences  |                                           |                                          |                  |
| <b>Zabzugu district</b> | 118 (45.2)                                | 1 (0.4)                                  | 119 (45.6)       |
| <b>Tatale district</b>  | 29 (11.1)                                 | 105 (40.2)                               | 134 (51.3)       |
| <b>Other districts</b>  | 6 (2.3)                                   | 2 (0.8)                                  | 8 (3.1)          |
| Educational Level       |                                           |                                          |                  |

|                                 |            |           |            |
|---------------------------------|------------|-----------|------------|
| <b>Formal education</b>         | 36 (13.8)  | 37 (14.2) | 73 (28.0)  |
| <b>No formal education</b>      | 117 (44.8) | 71 (27.2) | 188 (72.0) |
| Occupation                      |            |           |            |
| <b>Unemployed</b>               | 50 (19.2)  | 30 (11.5) | 80 (30.7)  |
| <b>Skilled worker</b>           | 12 (4.6)   | 9 (3.5)   | 21 (8.1)   |
| <b>None skilled worker</b>      | 91 (34.9)  | 69 (26.4) | 160 (61.3) |
| Marital Status                  |            |           |            |
| <b>Never Married</b>            | 10 (3.8)   | 17 (6.5)  | 27 (10.3)  |
| <b>Ever Married</b>             | 143 (54.8) | 91 (34.9) | 234 (89.7) |
| NHIS Status                     |            |           |            |
| <b>Registered with NHIS</b>     | 139 (53.3) | 97 (37.1) | 236 (90.4) |
| <b>Not registered with NHIS</b> | 14 (5.4)   | 11 (4.2)  | 25 (9.6)   |

197 NHIS = National Health Insurance, ZDH = Zabzugu District Hospital, TDH = Tatale District Hospital, IQR:

198 Interquartile range

199

## 200 **Clinical characteristics of the study participants**

201 Table 2 presents results of clinical characteristics of the study participants. Majority (64.0%) were  
 202 diagnosed at WHO stage I and 42.91% had disclosed their HIV status to another person other than  
 203 the healthcare provider. Most of the participants (83.14%) were on Efavirenz-based Combination  
 204 while 52.87% were alive and traceable at the time of the study.

205

206

207

208

209

210

211

212

213

214

215

216

217

218



219 **Table 1: Clinical Characteristics of Study Participants**

| Variable                       | Zabzugu District<br>Frequency (%) | Tatale District<br>Frequency (%) | Total (%)  |
|--------------------------------|-----------------------------------|----------------------------------|------------|
| <b>WHO HIV Stage</b>           |                                   |                                  |            |
| Stage I                        | 105 (40.2)                        | 62 (23.8)                        | 167 (64.0) |
| Stage II                       | 15 (5.7)                          | 25 (9.6)                         | 40 (15.3)  |
| Both stage III & IV            | 33 (12.6)                         | 21 (8.0)                         | 54 (20.6)  |
| <b>HIV status disclosure</b>   |                                   |                                  |            |
| Disclosed                      | 70 (26.8)                         | 42 (16.1)                        | 112 (42.9) |
| Not disclosed                  | 83 (31.8)                         | 66 (25.3)                        | 149 (57.1) |
| <b>Combined ARV type</b>       |                                   |                                  |            |
| EBC                            | 129 (49.4)                        | 88 (33.7)                        | 217 (83.1) |
| DBC                            | 24 (9.2)                          | 20 (7.7)                         | 44 (16.9)  |
| <b>ARV's treatment outcome</b> |                                   |                                  |            |
| Dead                           | 23 (8.8)                          | 10 (3.6)                         | 33 (12.6)  |
| Alive                          | 86 (33.0)                         | 52 (19.9)                        | 138 (52.9) |
| LTFU                           | 44 (16.9)                         | 46 (17.6)                        | 90 (34.5)  |

220 WHO = World Health Organization, HIV = Human Immune Virus, ARV's = Antiretrovirals, n = Sample Size, LTFU  
 221 = Loss to Follow Up, DBC = Dolutegravir Based Combination, EBC = Efavirenz Based Combination.

222  
 223 **Five-Year Trend of Survival Probabilities**

224 A total of 635.981 person-years with 2.17 median person years of follow-up was contributed by  
 225 the 261 participants. In the first year of follow-up, 15 mortalities were recorded giving a survival  
 226 probability of 0.9376 (95% CI: 0.8987-0.9619) for the period. After three years of follow-up, the  
 227 cumulative mortality was 32 and a survival probability of 0.8337 (95% CI: 0.7704-0.8809). With  
 228 decline in mortalities over the years, the overall mortality at the end of the fifth years was 33 and  
 229 a survival probability of 0.8049 (95% CI: 0.7145-0.8693) (table 3).

230  
 231 Table 2: survival probabilities

| <b>Total person-years</b>               |            | <b>635.981</b> |            |                               |
|-----------------------------------------|------------|----------------|------------|-------------------------------|
| <b>Median person years of follow-up</b> |            | <b>2.17</b>    |            |                               |
| Years                                   | No at-risk | Deaths         | Iterations | Survival Probability (95% CI) |
| <b>0-1</b>                              | 261        | 15             | 41         | 0.9376 (0.8987-0.9619)        |
| <b>1-2</b>                              | 205        | 10             | 56         | 0.8847 (0.8334-0.9209)        |
| <b>2-3</b>                              | 139        | 7              | 35         | 0.8337 (0.7704-0.8809)        |

---

|            |    |   |    |                        |
|------------|----|---|----|------------------------|
| <b>3-4</b> | 97 | 0 | 40 | 0.8337 (0.7704-0.8809) |
| <b>4-5</b> | 57 | 1 | 56 | 0.8049 (0.7145-0.8693) |

---

232 CL = Confidence Interval, NO = Number

233

234 Overall, the Kaplan-Meier survival curve revealed that the majority of fatalities occurred in the  
235 first to third years after starting ARVs, thus 15, 10 & 7 respectively. Even though the overall  
236 cumulative survival probability for the five-year study period was 0.8049, those who were  
237 diagnosed at the WHO stages I and II had a higher survival probability as shown in figure 1 and  
238 so was for women and those in the age group of 13-29 years. Patients who did not disclose their  
239 HIV status had higher survival probability than those who disclosed their status but this trend  
240 changed after two years of follow-up where the survival probabilities of those who disclosed their  
241 status improved (Figure1).

242

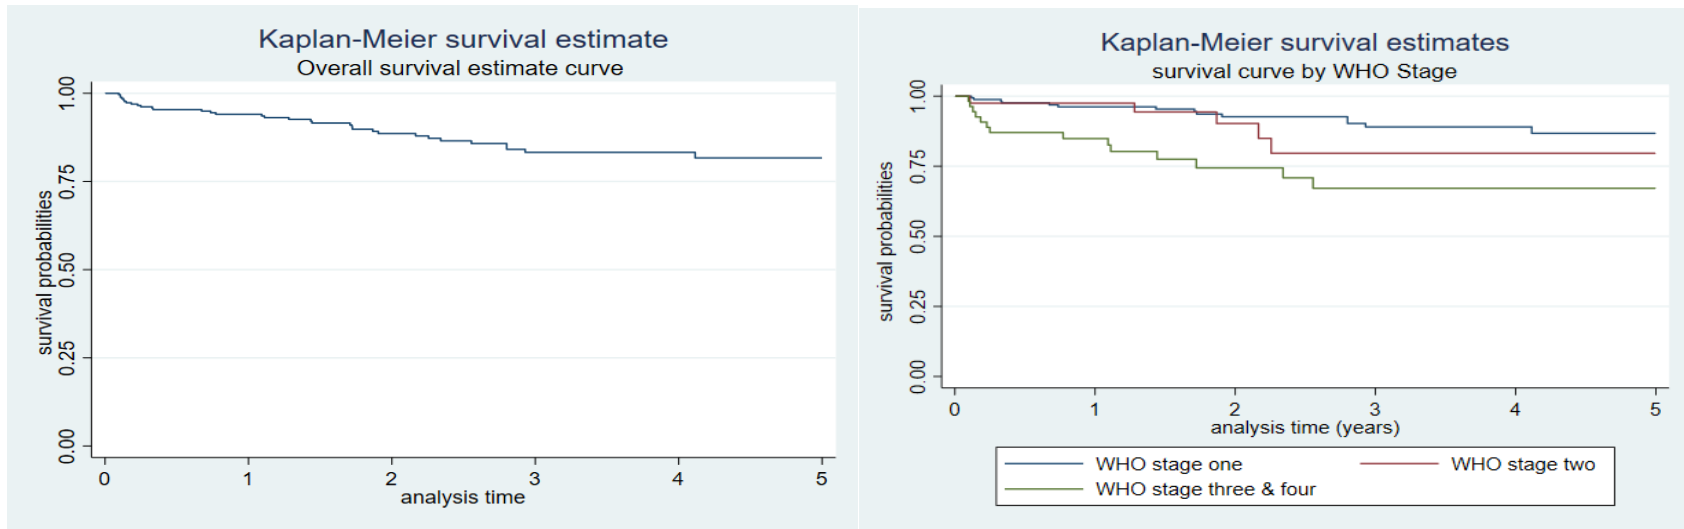

243  
244

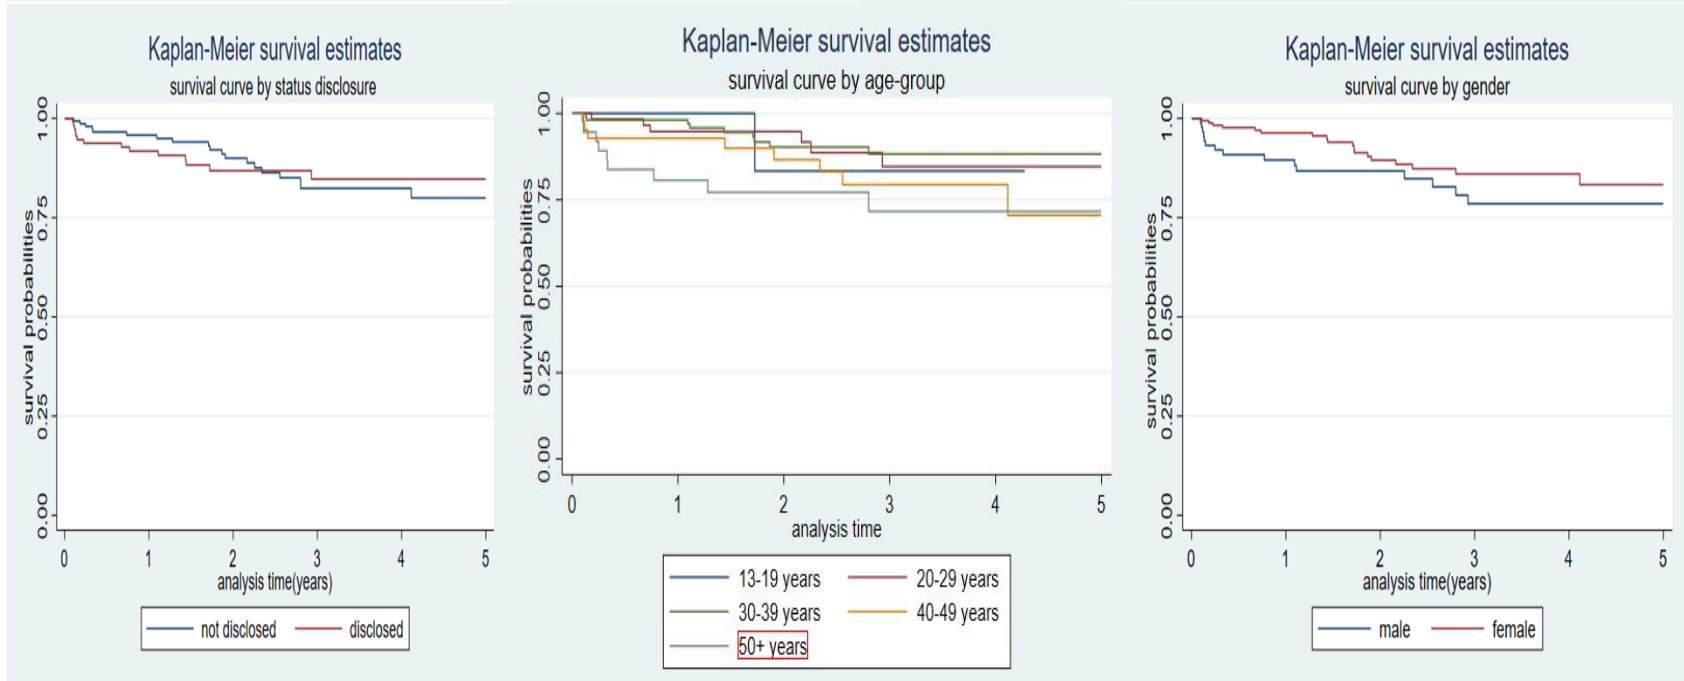

Figure 1: Kaplan Meier's Survival Estimates

245 **Five-Year Mortality Rates among PLWH on ARVs.**

246 Thirty-three (12.64%) participants died during the study period. The total person years for the five-  
247 year period was 635.98 person years with the overall mortality rate of 51.89 (95% CI: 36.89-72.97)  
248 per 1000 person years. Mortality rates were higher above the overall rate among participants 30  
249 years and above, 55.22 (95% CI: 37.60-81.10) per 1000 person years and males 68.65 (95% CI:  
250 41.39-113.87) per 1000 person years. The mortality rate was almost even among those who  
251 disclosed their HIV status and those who did not with 53.60 (95% CI: 31.75- 90.51) per 1000  
252 person-years and 50.69 (95% CI: 32.34-79.48) per 1000 person-years respectively. WHO stage III  
253 and IV recorded the highest mortality rate of 123.75 (95% CI: 73.29-208.95) per 1000 person-  
254 years.

255 In the univariate competing risk regression analysis, age was statistically significant and associated  
256 with mortality. The hazard of mortality was 3.28 times higher among those aged 50 and above  
257 [HR: 3.28; 95% CI: 1.29-8.33, p=0.013] and after adjusting for confounders in the multivariable  
258 analysis [AHR: 5.02; 95% CI: 1.78-14.13, p=0.002]. WHO stage was statistically significant, the  
259 hazard of mortality was 3.51 times higher among those diagnosed at WHO stage III & IV [HR:  
260 3.51; 95% CI: 1.67-7.38, p=0.001] and the same was the case after adjusting for confounders  
261 [AHR: 4.63; 95% CI: 1.91-11.18, p=0.001], however, we cannot rule out region and marital status  
262 as factors influencing mortality among PLWH (Table 4).

263 Table 3: Mortality rates and their determinants

| Variable (n=261)   | Dead | PY     | Mortality Rate per 1000 PY (95%CI) | Univariate Analysis |         | Multivariable Analysis |         |
|--------------------|------|--------|------------------------------------|---------------------|---------|------------------------|---------|
|                    |      |        |                                    | SHR (95% CI)        | P-Value | ASHR (95% CI)          | P-Value |
| Overall            | 33   | 635.98 | 51.89 (36.89-72.97)                | ...                 |         | ...                    |         |
| <b>Age (years)</b> |      |        |                                    |                     |         |                        |         |
| 13-19              | 1    | 23.57  | 42.42 (5.98-301.15)                | 0.92 (0.12-7.09)    | 0.940   | 6.33 (0.78-51.08)      | 0.083   |
| 20-29              | 6    | 141.58 | 42.38 (19.04-94.33)                | 1.12 (0.40-3.12)    | 0.827   | 1.72 (0.54-5.50)       | 0.358   |
| 30-39              | 9    | 275.51 | 32.67 (16.10-62.78)                | 1                   |         | 1                      |         |
| 40-49              | 8    | 111.96 | 71.46 (35.74-142.88)               | 2.31 (0.90-5.95)    | 0.082   | 1.77 (0.60-5.18)       | 0.298   |
| 50+                | 9    | 83.36  | 107.96 (56.17-207.49)              | 3.28 (1.29-8.33)    | 0.013   | 5.02 (1.78-14.13)      | 0.002   |
| <b>Gender</b>      |      |        |                                    |                     |         |                        |         |
| Female             | 18   | 417.48 | 43.12 (27.16-68.43)                | 1                   |         | 1                      |         |
| Male               | 15   | 218.50 | 68.65 (41.39-113.87)               | 1.70 (0.85-3.37)    | 0.132   | 1.06 (0.44-2.51)       | 0.893   |
| <b>Religion</b>    |      |        |                                    |                     |         |                        |         |
| Traditional        | 6    | 185.79 | 32.29 (14.51-71.88)                | 1                   |         | 1                      |         |
| Christian          | 13   | 255.69 | 50.84 (29.52-87.56)                | 1.38 (0.52-3.67)    | 0.516   | 2.08 (0.73-5.96)       | 0.173   |
| Muslim             | 14   | 194.50 | 71.98 (42.63-121.53)               | 2.20 (0.83-5.79)    | 0.111   | 2.74 (0.94-7.99)       | 0.065   |

---

|                        |    |        |                      |                   |       |  |                   |       |
|------------------------|----|--------|----------------------|-------------------|-------|--|-------------------|-------|
| <b>Education</b>       |    |        |                      |                   |       |  |                   |       |
| Formal Education       | 9  | 150.62 | 59.75 (31.09-114.84) | 1                 |       |  | 1                 |       |
| No formal Education    | 24 | 485.36 | 49.45 (33.14-73.77)  | 1.02 (0.47-2.19)  | 0.963 |  | 0.58 (0.23-1.45)  | 0.247 |
| <b>Occupation</b>      |    |        |                      |                   |       |  |                   |       |
| Unemployed             | 6  | 191.11 | 31.40 (14.10-69.88)  | 1                 |       |  | 1                 |       |
| Skilled worker         | 3  | 53.49  | 56.08 (18.09-173.89) | 1.96 (0.49-7.79)  | 0.337 |  | 2.41 (0.43-13.42) | 0.315 |
| None Skilled           | 24 | 391.38 | 61.32 (41.10-91.49)  | 2.06 (0.85-4.99)  | 0.111 |  | 2.23 (0.82-6.07)  | 0.117 |
| <b>Marital status</b>  |    |        |                      |                   |       |  |                   |       |
| Never married          | 1  | 59.83  | 16.71 (2.35-118.66)  | 1                 |       |  | 1                 |       |
| Married                | 32 | 576.15 | 55.54 (39.28-78.54)  | 3.91 (0.54-28.19) | 0.177 |  | 5.16 (0.97-27.50) | 0.054 |
| <b>NHIS status</b>     |    |        |                      |                   |       |  |                   |       |
| Not Registered         | 3  | 59.79  | 50.17 (16.18-155.56) | 1                 |       |  | 1                 |       |
| Registered             | 30 | 576.19 | 52.07 (36.40-74.47)  | 1.05 (0.31-3.56)  | 0.931 |  | 1.36 (0.40-4.61)  | 0.620 |
| <b>Health facility</b> |    |        |                      |                   |       |  |                   |       |
| TDH                    | 10 | 234.80 | 42.59 (22.92-79.15)  | 1                 |       |  | 1                 |       |
| ZDH                    | 23 | 401.18 | 57.33 (38.10-86.27)  | 1.66 (0.79-3.48)  | 0.181 |  | 2.05 (0.75-5.60)  | 0.161 |

---

| <b>Combined ARV type</b> |    |        |                       |                   |       |                   |       |  |
|--------------------------|----|--------|-----------------------|-------------------|-------|-------------------|-------|--|
| DBC                      | 2  | 77.48  | 25.81 (6.46-103.21)   | 1                 |       |                   | 1     |  |
| TBC                      | 31 | 558.50 | 55.51 (39.04-78.93)   | 2.71 (0.64-11.46) | 0.176 | 2.16 (0.38-12.45) | 0.386 |  |
| <b>Status disclosure</b> |    |        |                       |                   |       |                   |       |  |
| Not disclosed            | 19 | 374.80 | 50.69 (32.34-79.48)   | 1                 |       |                   | 1     |  |
| Disclosed                | 14 | 261.18 | 53.60 (31.75- 90.51)  | 1.06 (0.53-2.11)  | 0.861 | 1.20 (0.57-2.53)  | 0.628 |  |
| <b>WHO stage</b>         |    |        |                       |                   |       |                   |       |  |
| Stage I                  | 14 | 436.16 | 32.10 (19.01-54.20)   | 1                 |       |                   | 1     |  |
| Stage II                 | 5  | 86.69  | 57.68 (24.01-138.58)  | 1.65 (0.60-4.51)  | 0.332 | 1.53 (0.50-4.67)  | 0.454 |  |
| Stage III&IV             | 14 | 113.13 | 123.75 (73.29-208.95) | 3.51 (1.67-7.38)  | 0.001 | 4.63 (1.91-11.18) | 0.001 |  |

264 n= Sample Size, PY= Person Years, CI=Confidence Interval, Edu= Education, ZDH= Zabzugu District Hospital, TDH= Tatale District Hospital, TBC=  
265 Tenofovir Based Combination, DBC= Dolutegravir Based Combination, WHO= World Health Organization

266 Figure 2 presents the illustration of the hazard of mortality over the study period. The hazard of  
267 mortality is highest between the first and the second year of follow-up but declined steadily over  
268 the rest of the study period from the second year on wards.  
269

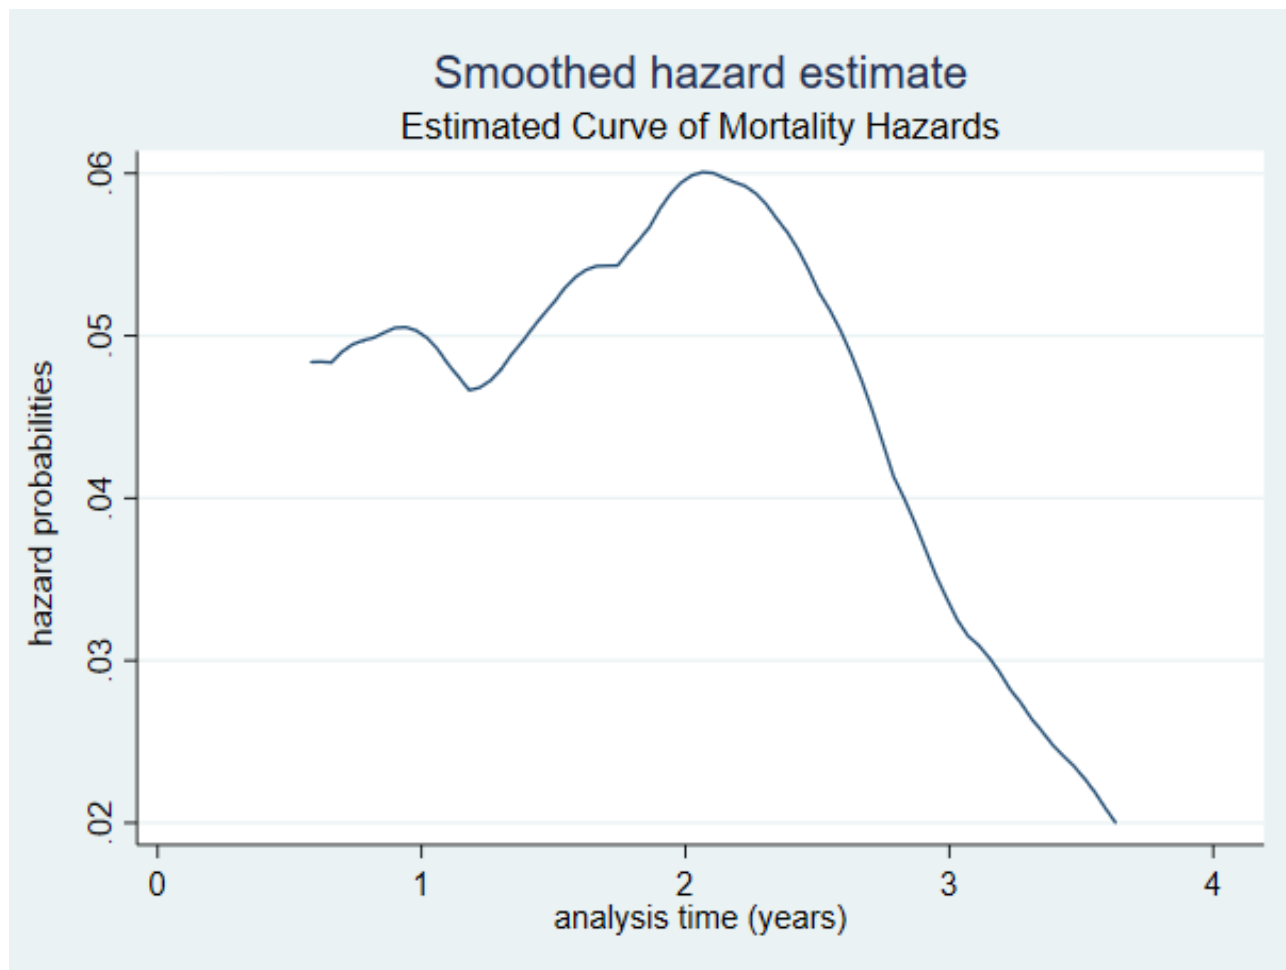

270  
271 Figure 2: Mortality Hazard curve

272  
273 **Discussion**

274 Preventing major AIDS-related and non-AIDS-related illnesses in HIV-infected individuals  
275 requires early initiation of antiretroviral medication [16]. The majority of the participants were  
276 initiated to ARVs at WHO stages I and II (79.31%), This was however different from what was  
277 reported in a study conducted in Ghana to assess the effects of antiretroviral therapy on all-cause  
278 of mortality among PLWH. In that study, 51.0% of PLWH were diagnosed at WHO stage I and  
279 II [17]. An expanded study involving most of the HIV sentinel sites in Ghana also found an even



280 lower (27.7%) prevalence of HIV initiation at WHO stage I & II [18]. The variation in findings  
281 could be due to the fact that the study was conducted during the period of the 90-90-90 treatment  
282 policy where there was a more accelerated action for HIV testing and treatment. During that  
283 period, testing was done at the OPD instead of the laboratory where only clients who were  
284 suspected of being infected were referred for testing. Providing testing services for all persons,  
285 whether symptomatic or not, meant that more clients would be diagnosed in the earlier stages of  
286 the disease.

287 The current study identified the majority were alive and on treatment at the end of the five years  
288 of follow-up, while 34.5% were lost to follow up (LTFU) and the remaining 12.64% were dead.  
289 Our findings were a little different from the findings in a study in a primary public hospital of  
290 Wukro, Tigray, Ethiopia, where 11% of LTFU was recorded [19]. The reason for the high rate of  
291 LTFU could be due to the high numbers diagnosed at WHO stages I and II, who are asymptomatic  
292 and may not see the need to take their medications. Most of the fatalities occurred in the first and  
293 second years following the start of ARVs [7]. The overall survival probabilities for the first and  
294 fifth years were 0.9376 and 0.8049, respectively. These findings, projected an improvement in  
295 terms of survival probabilities when compared with another study conducted in Ghana in the  
296 Lawra and Jirapa districts in the upper west region where the survival probability at the end of the  
297 three years was 0.795 per 1000 person years [7]. The findings were similar to the findings of a  
298 study conducted in the Henan province of China from 2005 to 2014 where the cumulated survival  
299 for the first and fifth year were 93.7% and 85.3% respectively [20]. The reason for the  
300 improvement in survival probabilities could be due to the removal of all barriers to the initiation  
301 of ARVs and early diagnosis due to the 90-90-90 policy which was not the case during the period  
302 of the study by Okyere et al., (2015).

303 Significant differences in survival probabilities were observed among specific variables using the  
304 Kaplan-Meier survival curve. WHO stages I and II had the highest survival probability and this  
305 finding agreed with studies in Ghana's upper west region and Oromiyaa, Ethiopia where WHO  
306 stages I and II had the highest survival probability than stages III and IV [7,21]. The reason for  
307 the variation among the various stages could be due to the prognosis of the disease at the time of  
308 diagnosis and initiation of the ARVs. Although disclosure of one's status may play a role in  
309 controlling the spread of HIV, it had very little impact on the improvement of the survival

310 probability of the clients in the short term. However, in the long term, disclosing status disclosure  
311 gives an individual a better chance of survival compared to someone who has not disclosed the  
312 status. The reason for this dynamics could be due to the support that those who disclose their status  
313 receive from their treatment supporters. Females had better survival probabilities than their male  
314 counterparts and this can be attributed to the health-seeking behaviors of females [22].

315 The overall mortality rate observed was low compared with what was found in a retrospective  
316 cohort study from 2004-2013 in Nepal [23]. The reason for the reduction in overall mortality in  
317 this study may be due to the fact that majority of the participants were diagnosed at WHO stage I  
318 and II [24]. Mortality was highest among those diagnosed at the WHO stage III and IV, meaning  
319 this group will need special attention, especially within the first two years of diagnosis where most  
320 of the deaths occurred. Regular clinic visits, viral load monitoring, and adherence to the ARV  
321 regimen are essential to prevent mortalities. Other areas where significant variations in mortality  
322 was observed were gender and religion. Morality was high among males compared to females and  
323 that can be attributed to the health seeking behaviors of the male gender [22].

324 The hazard of mortality after the initiation of ARVs was statistically significant and associated  
325 with those in WHO stages III and IV and age group 50+ years and after adjusting in a multivariable  
326 analysis, WHO stage III and IV and age group 50+ years remained significant. The findings were  
327 similar to other studies that were conducted in Ghana, sub-Saharan Africa, and other parts of the  
328 world [7,17,21,23,25]. From the smooth hazard curve, the risk of mortality is highest in the first  
329 and second years of ARVs initiation. More pragmatic efforts including regular clinic visits, early  
330 diagnosis of opportunistic infections, viral load monitoring and so on, are required to reduce the  
331 death rate within the first and second years of ARVs initiation.

### 332 **Strengths and limitations**

333 This is the first study of its kind on this subject and will contribute greatly to literature and also  
334 serve as a baseline finding for future studies. The lack of a comparison group restricted our ability  
335 to compare the outcome between those initiated on ARVs and those that are not on ARVs. Hence,  
336 comparison was done using previous studies while the presence of missing data also restricted the  
337 inclusion of variables such as viral load.

338

339

340 **Conclusion**

341 Survival probabilities have improved significantly among PLWH in the two districts compared to  
342 previous studies conducted before the introduction of the treat-all policy. We recommend the need  
343 for early diagnosis through testing at all entry points to hospitals and clinics and through the “Know  
344 your Status” campaigns for HIV. Clients who are 50 years and above and those who were  
345 diagnosed at the WHO stages III and IV should be given shorter clinic visit intervals and ensure  
346 viral load monitoring is done as recommended by the National AIDS Control Program.

347

348 **Availability of data and materials**

349 All data are fully available without restriction

350

351 **Competing interests**

352 The authors declare that no competing interest existed for this study

353

354 **Funding**

355 None

356

357 **Author Contributions**

358 Conceptualization: ES, RNA, MMB, KB, MSY, DAO, AM, DB, EKN & AKE

359 Data curation: ES, RNA, NKAB & MMB,

360 Formal analysis: ES, RNA, MMB, KB & MSY

361 Methodology: ES, RNA, MMB, KB, MSY, DAO, NKAB, AM, DB, EKN & AKE

362 Project administration: ES, RNA, MMB, KB & MSY,

363 Supervision: AM, DB, EKN & AKE

364 Validation: DAO, AM, DB, EKN & AKE

365 Writing – original draft: ES, RNA, MMB, KB & MSY

366 Writing – review and editing: DAO, NKAB, AM, DB, EKN & AKE

367

368 **Acknowledgements**

369 We are grateful to all PLHIV whose records we reviewed for this study. To all the staff of the four  
370 ARVs centers in both Tatale and Zabzugu, we thank them for their efforts in saving lives and the

371 documentation without which this study would not have been possible. We are also grateful to the  
372 management of the two hospitals and the District Directors of Health Services for their approval  
373 of the study. We are most grateful to God for the inspiration, guidance and protection throughout  
374 the study.

375

## 376 **Reference**

- 377 1. Owusu-ansah Y. Socio-economic effect of HIV / AIDS in Ghana. 2009;(December 2002).  
378 Available from: [https://www.ghanaweb.com/GhanaHomePage/features/Socio-economic-](https://www.ghanaweb.com/GhanaHomePage/features/Socio-economic-effect-of-HIV-AIDS-in-Ghana-30981)  
379 [effect-of-HIV-AIDS-in-Ghana-30981](https://www.ghanaweb.com/GhanaHomePage/features/Socio-economic-effect-of-HIV-AIDS-in-Ghana-30981)
- 380 2. Center for Disease Control and Prevention. HIV Basics | HIV/AIDS | CDC [Internet]. 2022  
381 [cited 2022 Apr 6]. Available from: <https://www.cdc.gov/hiv/basics/index.html>
- 382 3. HIV.gov. Homepage | HIV.gov [Internet]. US Department of Health and Human Services.  
383 2021 [cited 2021 Jul 11]. Available from: <https://www.hiv.gov>
- 384 4. World Health Organization. HIV and AIDS [Internet]. 2023 [cited 2023 Apr 21]. Available  
385 from: <https://www.who.int/news-room/fact-sheets/detail/hiv-aids>
- 386 5. Ghana AIDS Commission. Ghana's HIV Fact Sheet. Off Pres Ghana. 2019;523:1–6.
- 387 6. Zolopa AR. The evolution of HIV treatment guidelines: Current state-of-the-art of ART.  
388 *Antiviral Res.* 2010 Jan;85(1):241–4.
- 389 7. Okyere GA, Alalbil PA, Ping-Naah H, Tifere Y. Determinants of Survival in Adult HIV  
390 Clients on Antiretroviral Therapy in Lawra and Jirapa Districts of Upper West Region, Ghana.  
391 *J Int Assoc Provid AIDS Care JIAPAC.* 2015 May;14(3):255–60.
- 392 8. Raguenaud ME, Isaakidis P, Zachariah R, Te V, Soeung S, Akao K, et al. Excellent outcomes  
393 among HIV+ children on ART, but unacceptably high pre-ART mortality and losses to follow-  
394 up: A cohort study from Cambodia. *BMC Pediatr.* 2009;9:54.
- 395 9. Frank TD, Carter A, Jahagirdar D, Biehl MH, Douwes-Schultz D, Larson SL, et al. Global,  
396 regional, and national incidence, prevalence, and mortality of HIV, 1980-2017, and forecasts  
397 to 2030, for 195 countries and territories: A systematic analysis for the Global Burden of  
398 Diseases, Injuries, and Risk Factors Study 2017. *Lancet HIV.* 2019 Dec;6(12):e831–59.
- 399 10. United Nations. THE 17 GOALS | Sustainable Development [Internet]. Department of  
400 Economic and Social Affairs. 2018 [cited 2021 Jul 11]. Available from:  
401 <https://sdgs.un.org/goals>
- 402 11. Ghana AIDS Commission. Ghana AIDS Commission [Internet]. Ghana Aids Commission.  
403 2017. p. 1–31. Available from: <https://www.ghanaims.gov.gh>  
404 [http://www.ghanaims.gov.gh/gac1/aids\\_info.php](http://www.ghanaims.gov.gh/gac1/aids_info.php)

- 405 12. Weber R, Ruppik M, Rickenbach M, Spoerri A, Furrer H, Battegay M, et al. Decreasing  
406 mortality and changing patterns of causes of death in the Swiss HIV Cohort Study. *HIV Med.*  
407 2013 Apr;14(4):195–207.
- 408 13. Ghana Statistical Service. Zabzugu district. 2010. 1–10 p.
- 409 14. Ghana Statistical Service. Tatale sanguli district. 2010. 1–10 p.
- 410 15. Harmon JL, Barroso J, Pence BW, Leserman J, Salahuddin N. Demographic and Illness-  
411 Related Variables Associated with HIV-Related Fatigue. *J Assoc Nurses AIDS Care JANAC.*  
412 2008;19(2):90–7.
- 413 16. HIV.gov. Demographics | AHEAD [Internet]. 2023 [cited 2023 Aug 8]. Available from:  
414 <https://ahead.hiv.gov/methods/demographics>
- 415 17. Anthony F. National Institutes of Health (NIH). 2015 [cited 2023 Mar 7]. Benefits of Early  
416 Antiretroviral Therapy in HIV Infection. Available from: [https://www.nih.gov/news-](https://www.nih.gov/news-events/nih-research-matters/benefits-early-antiretroviral-therapy-hiv-infection)  
417 [events/nih-research-matters/benefits-early-antiretroviral-therapy-hiv-infection](https://www.nih.gov/news-events/nih-research-matters/benefits-early-antiretroviral-therapy-hiv-infection)
- 418 18. Dwomoh D, Tamba C, Addo SA, Wiah E, Abdulai M, Bosomprah S. Effect of antiretroviral  
419 therapy on all-cause mortality among people living with HIV/AIDS in Ghana using  
420 Mahalanobis distant metric matching within propensity score caliper analysis: A retrospective  
421 cohort study. *PLOS ONE.* 2018 Sep 7;13(9):e0203461.
- 422 19. Obiri-Yeboah D, Pappoe F, Baidoo I, Arthur F, Hayfron-Benjamin A, Essien-Baidoo S, et al.  
423 Immunologic and virological response to ART among HIV infected individuals at a tertiary  
424 hospital in Ghana. *BMC Infect Dis.* 2018 Dec;18(1):1–7.
- 425 20. Mehari D, Mache T, Hailemariam L. Predictors of lost to follow up to antiretroviral therapy  
426 in primary public hospital of Wukro, Tigray, Ethiopia: A case control study. *J AIDS HIV Res.*  
427 2015 Jan 31;7(1):1–9.
- 428 21. Yao ST, Duan S, Xiang LF, Ye RH, Yang YC, Li YL, et al. [Survival analysis on 3103  
429 HIV/AIDS patients receiving antiretroviral treatment in Dehong prefecture, Yunnan province].  
430 *Zhonghua Liu Xing Bing Xue Za Zhi Zhonghua Liuxingbingxue Zazhi.* 2010 Nov  
431 1;31(11):1215–8.
- 432 22. Alemu AW, Sebastián MS. Determinants of survival in adult HIV patients on antiretroviral  
433 therapy in Oromiyaa, Ethiopia. *Glob Health Action.* 2010 Dec;3(1):5398.
- 434 23. Thompson AE, Anisimowicz Y, Miedema B, Hogg W, Wodchis WP, Aubrey-Bassler K. The  
435 influence of gender and other patient characteristics on health care-seeking behaviour: a  
436 QUALICOPC study. *BMC Fam Pract.* 2016 Mar 31;17(1):38.
- 437 24. Angdembe MR, Rai A, Bam K, Pandey SR. Predictors of mortality in adult people living with  
438 HIV on antiretroviral therapy in Nepal: A retrospective cohort study, 2004–2013. Maiga AI,  
439 editor. *PLOS ONE.* 2019 Apr 23;14(4):e0215776.

- 440 25. Coghill AE, Han X, Suneja G, Lin CC, Jemal A, Shiels MS. Advanced Stage at Diagnosis and  
441 Elevated Mortality among HIV-infected US Cancer Patients in the National Cancer Database.  
442 Cancer. 2019 Aug 15;125(16):2868–76.
- 443 26. Mangal TD, Meireles MV, Pascom ARP, de Almeida Coelho R, Benzaken AS, Hallett TB.  
444 Determinants of survival of people living with HIV/AIDS on antiretroviral therapy in Brazil  
445 2006-2015. BMC Infect Dis. 2019 Feb 28;19(1):206.
- 446
